# Supplementary material for: Fabrication of ordered arrays of CNT/TiO2 nanotubes and their photocatalytic properties
Source: Royal Society of Chemistry journal article supplement (doi:10.1039/c4ra17002d), 2015-01-01
Supplement: c4ra17002d1.pdf [file c4ra17002d1.pdf]

## EXPERIMENTAL SECTION

### 1. Experimental Materials

AAO membranes (Whatman Co. Ltd), C<sub>2</sub>H<sub>2</sub>, Ar, titanium isopropoxide (97+%, Alfa Aesar).

### 2. Construction of CNT/TiO<sub>2</sub> Coaxial Core-Shell Nanotube Arrays

#### 2.1 Preparation of carbon nanotubes in AAO templates:

Porous anodic aluminum oxide membranes (Whatman, Anodisc, 200-300 nm) were placed in a tubular furnace pre-heated to 650°C in an Ar carrying gas at a flow rate of 40 sccm, with the nanochannels oriented along the flow direction. A mixture of C<sub>2</sub>H<sub>2</sub> and Ar (20% C<sub>2</sub>H<sub>2</sub> and 80% Ar, at a flow rate of 50 sccm) was then flown for 14 min with the temperature maintained at 650°C. Finally, the furnace was cooled down to room temperature gradually in 7 hours in an Ar flow of 40 sccm.

#### 2.2 Preparation of CNT/TiO<sub>2</sub> composite nanotubes in AAO template:

Firstly, titanium isopropoxide (97+%, Alfa Aesar, USA) was stirred at room temperature for 30 min and then was heated to 55°C. Secondly, the carbon-nanotube-filled AAO membranes were immediately dipped into titanium isopropoxide and sonicated for 4 min first and then kept in still situation for 5 min. During this process, the temperature of titanium isopropoxide was maintained at 55°C. Finally, CNT-TiO<sub>2</sub> coaxial core-shell heterojunction arrays were obtained after the sample was baked at 300°C in the atmosphere for 2 h.

### 3. Characterization of the Products

Here we studied the morphology and structure by scanning electron microscopy

(SEM, JSM-6700F) and transmission electron microscopy (TEM, JEM-2100). Energy dispersive spectroscopy (EDS) and X-ray photoelectron spectroscopy (XPS, XSAM800) were used to show the elemental composition, chemical state and existence of the target products. Brunauer-Emmett-Teller (BET, SA-3100) was used to measure the surface area of the product by physisorption of nitrogen at 77 K. In order to show the morphologies of the samples clearly, for SEM and TEM analysis, the products were extracted from the AAO templates by using NaOH solutions ( $3\text{mol}\cdot\text{L}^{-1}$ ). UV-Vis spectroscopy was used to test the light absorption characteristic of the products. And finally a degradation experiment using MO as a target pollutant was also conducted to measure the photocatalytic properties of the products.

#### **4. Photocatalytic Degradation of MO**

The photocatalytic degradation of the sample  $\text{TiO}_2$ , CNT, CNT/ $\text{TiO}_2$  in AAO templates was performed in three separated quartz reactors containing methyl orange (MO) solution ( $10\text{ mg}\cdot\text{L}^{-1}$ ), and the pH of the solution was adjusted to 3 by using  $\text{H}_2\text{SO}_4$ . The samples were exposed to UV light (300 W, the strongest emission at 365 nm). The size of the sample used in the photocatalytic degradation test depended on the volume of the MO solution. The value was about  $1.5\text{ mL}/\text{cm}^2$ . The suspension was kept in the dark for 2 h to reach the adsorption-desorption equilibrium before the irradiation process started. The change of MO concentration as a function of the absorption maximum at a wavelength of 506 nm was monitored by UV-Vis spectrometer (UV-2450) absorption. The kinetics of the degradation reaction were also investigated by the equation:  $\ln(C_0/C) = kt$ , where  $C_0$  was the initial

concentration of MO, and  $C$  was the concentration during the reaction.  $k$  was the apparent rate constant, and  $t$  is the irradiation time.

## Figures and captions

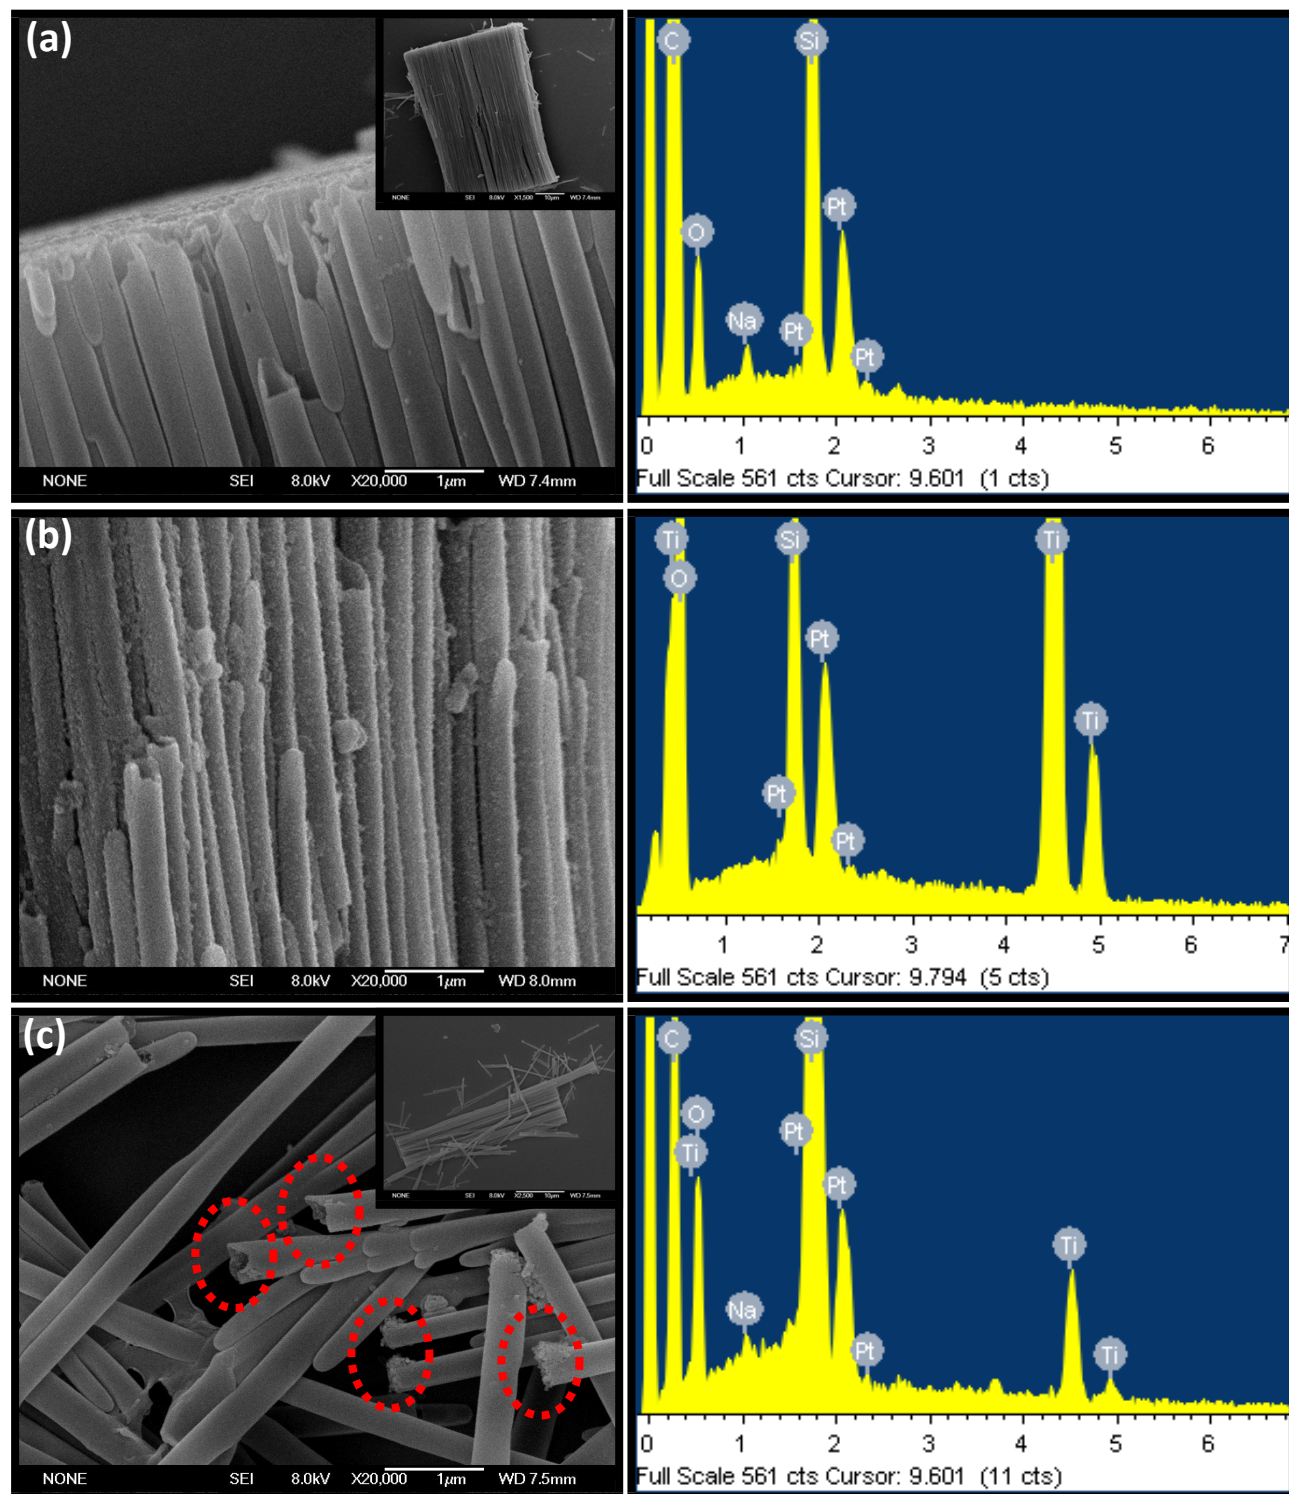

**Fig. S1.** SEM and EDS analyses of (a) CNTs, (b) TiO<sub>2</sub> nanotubes, and (c) CNT/ TiO<sub>2</sub> composite nanotubes.

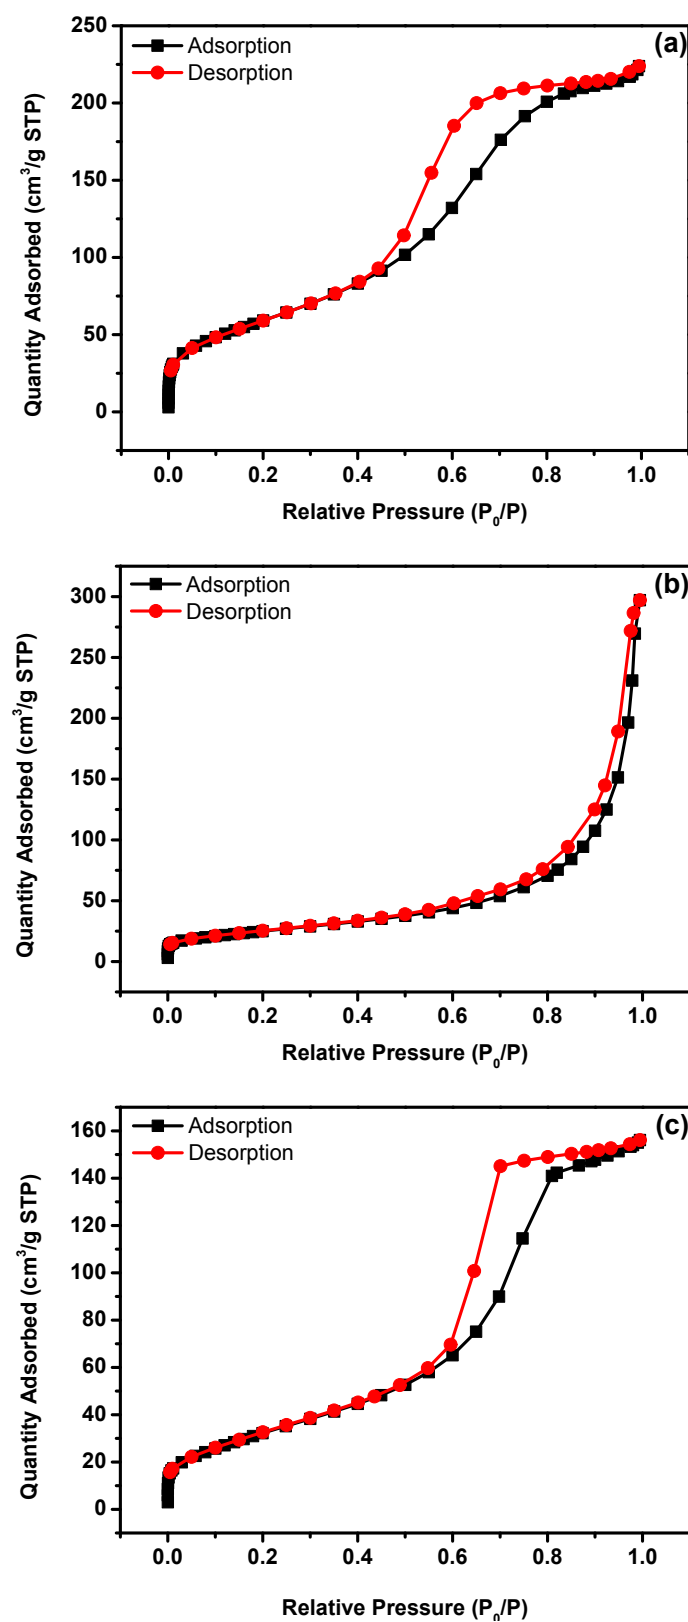

**Fig. S2.** Nitrogen adsorption-desorption isotherm of (a) CNTs, (b) TiO<sub>2</sub> nanotubes, and (c) CNT/TiO<sub>2</sub> composite nanotubes.

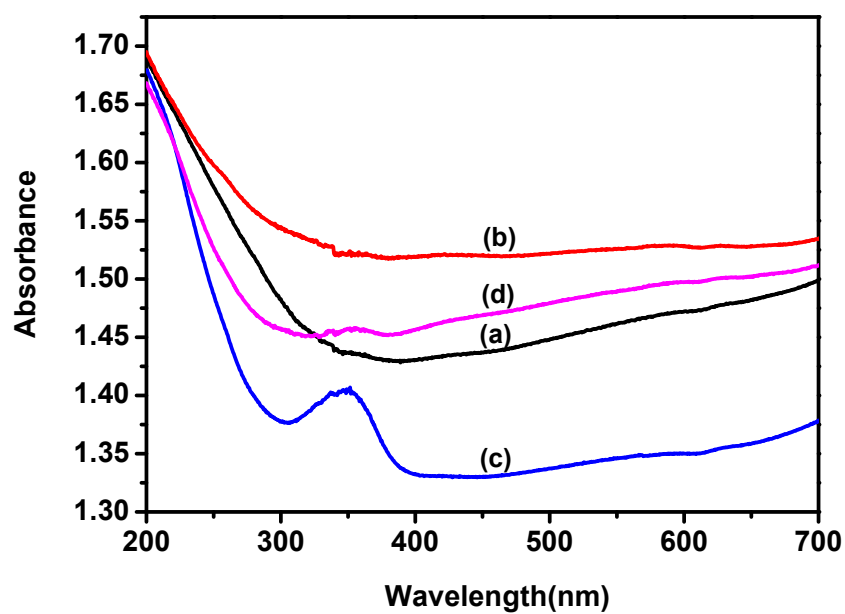

**Fig. S3.** UV-Vis diffuse-reflectance spectra of (a) AAO template, (b) CNTs imbedded in an AAO template, (c) TiO<sub>2</sub> nanotubes imbedded in an AAO template, and (d) CNT/TiO<sub>2</sub> composite nanotubes imbedded in an AAO template irradiated by a UV lamp.

**Table 1.** Surface area of CNTs, TiO<sub>2</sub> nanotubes, and CNT/TiO<sub>2</sub> composite nanotubes.

| Sample                                    | CNT   | TiO <sub>2</sub> | CNT/TiO <sub>2</sub> |
|-------------------------------------------|-------|------------------|----------------------|
| $S_{\text{BET}}(\text{m}^2\text{g}^{-1})$ | 221.6 | 90.6             | 122.5                |

**Table 2.** Apparent rate constant  $\kappa$  ( $\text{min}^{-1}$ ) of CNTs imbedded in an AAO template,  $\text{TiO}_2$  nanotubes imbedded in an AAO template, and CNT/ $\text{TiO}_2$  composite nanotubes imbedded in an AAO template.

| Sample                                | CNT   | $\text{TiO}_2$ | CNT/ $\text{TiO}_2$ |
|---------------------------------------|-------|----------------|---------------------|
| $\kappa$ ( $10^{-3}\text{min}^{-1}$ ) | 0.392 | 1.650          | 6.020               |
| $R^2$                                 | 0.978 | 0.998          | 0.982               |
